# Supplementary material for: Satellite-observed sea ice area flux through Baffin Bay: 1988–2015
Source: Copernicus journal article supplement (doi:10.5194/tc-2018-136), 2018-07-23
Supplement: Supplementary file [file tc-2018-136-AC2-supplement.pdf]

# Baffin Bay sea ice inflow and outflow:1978/1979-2016/2017

Haibo Bi<sup>1,2,3</sup>, Zehua Zhang<sup>1,2,3</sup>, Yunhe Wang<sup>1,2</sup>, Yu Liang<sup>1,2</sup>, Jue Huang<sup>5</sup>, Yilin Liu<sup>5</sup>, Haijun Huang<sup>1,2,3,4</sup>

<sup>1</sup>Key laboratory of Marine Geology and Environment, Institute of Oceanology, Chinese Academy of Sciences, Qingdao, China

<sup>2</sup>Laboratory for Marine Geology, Qingdao National Laboratory for Marine Science and Technology, Qingdao, China

5 <sup>3</sup>Center for Ocean Mega-Science, Chinese Academy of Sciences, Qingdao, China

<sup>4</sup>University of Chinese Academy of Sciences, Beijing, China

<sup>5</sup>Shandong University of Science and Technology, Qingdao, China

*Correspondence to:* Haijun Huang (hjhuang@qdio.ac.cn)

## Abstract.

10 Baffin Bay serves as a huge reservoir of sea ice which would provide the solid fresh water sources to the seas downstream. Employing satellite-derived sea ice motion and concentration fields, we obtain a nearly 40-yr record (1978/1979-2016/2017) of the sea ice area flux through key fluxgates of Baffin Bay. Based on the estimates, Baffin Bay sea ice area budget in terms of inflow and outflow are quantified and possible causes for its interannual variations and trends are analyzed. On average, the annual (September-August) inflows through the North Gate and Lancaster Sound are on the order of  
15  $205.8(\pm 74.7) \times 10^3 \text{ km}^2$  and  $55.2(\pm 17.8) \times 10^3 \text{ km}^2$ , respectively. In particular, a comparison with published results seem to suggest that about 75%~85% of the inflow through the North Gates is newly-formed ice produced in the recurring North Water Polynya (NWP), in addition to the inflow via Nares Strait and Jones Sound. Meanwhile, the mean outflow via the South Gate approaches to  $394.3(\pm 110.2) \times 10^3 \text{ km}^2$ . The distinct interannual variability for ice area flux through the North Gate and South Gate is partly explained by wind forcing associated with cross-gate sea level pressure difference, with a  
20 correlation of 0.62 and 0.68, respectively. Also, significant increasing trends are found for the annual sea ice area flux through the three gates, amounting to  $38.9 \times 10^3 \text{ km}^2/\text{de}$ ,  $82.2 \times 10^3 \text{ km}^2/\text{de}$ , and  $7.5 \times 10^3 \text{ km}^2/\text{de}$  for the North Gate, South Gate, and Lancaster Sound, respectively. These trends are chiefly related to the increasing ice motion which is associated with a thinner ice owing to the warmer climate over the past decades (i.e. higher surface air temperature and shortened freezing period).

## 25 1. Introduction

Baffin Bay is a semi-enclosed ocean basin that connects the Arctic Ocean and the Northwest Atlantic (Figure 1). It covers an area of  $630 \text{ km}^2$  and is bordered by Greenland to the east, Baffin Island to the west, and Ellesmere Island to the north. From the north to the south, the bay spans approximately 1280 km. In the north, it connects the Arctic Ocean through Nares Straits and the channels of the Canadian Arctic Archipelago (CAA). In the south, the bay is separated from the Labrador Sea by  
30 Davis Strait (~350 km in width). The width of the bay varies greatly, with a range of approximately 100 km to 600 km.

The mean circulation of Baffin Bay is characterized by a cyclonic pattern (Figure 1) (Melling et al., 2001; Dunlap and Tang, 2006). In the east side of the bay, a northward flowing West Greenland Current (WGC) along the Greenland coast carries warm and salty water from the North Atlantic. On the west side, the Baffin Current (BC) flows southward along the coast of Ellesmere and Baffin Island, bringing cold and fresh Arctic water and sea ice through Baffin Bay to Labrador Sea.

5 Therefore, Baffin Bay serves as an important sea ice reservoir and is an important fresh water source to Labrador Sea downstream (Curry et al., 2014; Qian et al., 2016; Cuny et al., 2002). A direct potential consequence of sea ice outflow is the formation of lighter sea-water that will strengthen the stratification of Labrador Sea through stabilizing the water column (Goosse et al., 1997; Rudels, 2010; Curry et al., 2014; Qian et al., 2016). These changes will potentially influences on the strength of the meridional overturning circulation mechanism of the North Atlantic Ocean which ultimately affects global

10 deep-water circulation and exchanges (Aagaard and Carmack, 1989; Holland et al., 2001; Jahn et al., 2010; Hawkins et al., 2011; Cimadoribus et al., 2012; Yang et al., 2016).

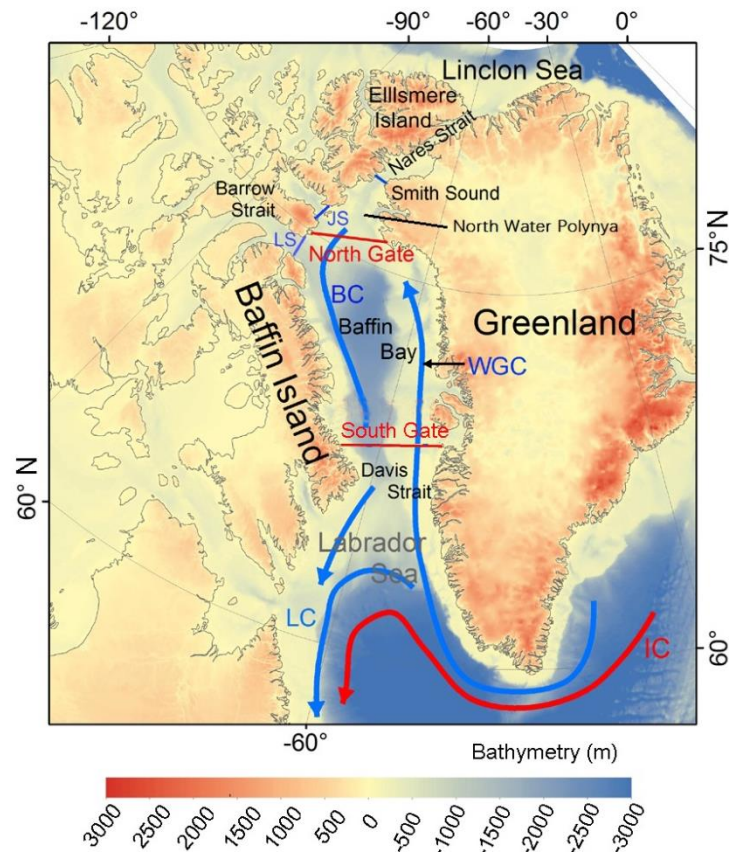

**Figure 1.** The mean circulation pattern in Baffin Bay (blue and red arrows) and the locations of the key fluxgates to assess sea ice area flux through the bay. The colder west Greenland current (WGC), Baffin Current (BC), and Labrador Current (LC) are marked with blue arrows. The warmer Irminger Current (IC) is represented by the red arrow. The key fluxgates through which sea ice floats into the bay includes Nares Strait, Jones Sound (JS), and Lancaster Sound (LS). Area flux through a defined North Gate together with the LS flux is used to quantify the sea ice area inflow to the bay. The outflow fields are depicted using flux via the South Gate.

15

Sea ice inflow and outflow have been considered as important variables for interpreting the sea ice area balance of the Arctic Ocean (Kwok et al., 2005; Spreen et al., 2006; Kwok, 2007; Kwok, 2009; Kwok et al., 2010; Smedsrud et al., 2011; Krumpen et al., 2013; Kwok et al., 2013; Bi et al., 2016a; Bi et al., 2016b; Krumpen et al., 2016; Smedsrud et al., 2017; Zhang et al., 2017). For instance, satellite-derived sea ice export has been investigated in some key water fluxgates around the periphery of the Arctic Basin, with Fram Strait being the primary focus of study owing to its significant contribution to the changes of the Arctic sea ice extent (Smedsrud et al., 2011; Smedsrud et al., 2017). In Baffin Bay, sea ice loss due to outflow through Davis Strait can be largely replenished by the inflows from the north through the Lancaster Sound (LS), Jones Sound (JS), and Nares Strait (Figure 1). Additionally, North Water Polynya (NWP), approximately located between Smith Sound and the North Gate (Figure 1 and S1), is deemed as an important source of newly-formed sea ice to the bay.

Baffin Bay sea ice inflow and outflow have significant implications for understanding the current radical climate change, because a strong atmospheric warming trend has been widely noted in the northern high latitudes (Serreze et al., 2009; Stroeve et al., 2014; Graham et al., 2017; Stroeve et al., 2018). In Baffin Bay, surface air temperature has increased by 2 to 3 °C/de since the late 1990s (Peterson and Pettipas, 2013), resulting in prolonged days of sea ice melting there (i.e. earlier melting onset and delayed ice-freezing startup) (Stroeve et al., 2014). Accordingly, a rapid decline of sea ice coverage in all seasons has been clearly identified in the bay (Comiso et al., 2017b; Parkinson and Cavalieri, 2017). Within the context of such a pronounced climate change, examining the variability and trends in sea ice outflow through Baffin Bay over a long time series is of particular interest. Although interannual variability in sea ice inflow and/or outflow components in Baffin Bay has been reported in several studies (Cuny et al., 2005; Kwok, 2007; Curry et al., 2014), robust knowledge of their trends is of necessary to predict future changes and validate model results. This study attempts to provide an extended record of the satellite-derived sea ice inflow and outflow over nearly four decades (1978/1979-2011/2017) through the key fluxgates of Baffin Bay and to examine the possible causes of the trends.

## **2. Data description**

### **2.1 Data**

#### **2.1.1 Sea ice motion**

The Polar Pathfinder Daily 25 km EASE-Grid Sea Ice Motion Vectors product was provided by the National Snow and Ice Data Center (NSIDC) (Tschudi et al., 2016). This product has been widely used by the modeling and data assimilation communities (<http://nsidc.org/data/NSIDC-0116>). It is derived from a variety of sensors on satellite platforms, including the Advanced Very High Resolution Radiometer (AVHRR), Scanning Multichannel Microwave Radiometer (SMMR), Special Sensor Microwave Imager (SSM/I), Special Sensor Microwave Imager Sounder (SSMIS), and Advanced Microwave Scanning Radiometer-Earth Observing System (AMSR-E), and merged with buoy measurements from the International

Arctic Buoy Program (IABP) to obtained estimates determined from the reanalyzed wind data. When conducting the present study this product was available for the period from November 1978 to February 2017 (Tschudi et al., 2016).

To assess the NSIDC data, a reference product of sea ice motion, which is visually retrieved from high-resolution (~100 m) Envisat wide-swath (~450 km) observations, is employed. The Envisat estimates, sampled on a 10 km grid cell, have an overall uncertainty of ~300 m (Kwok, 2007). To facilitate a direct comparison, the final Envisat estimates are smoothed to a 25-km grid, and then spatially registered to the NSIDC data.

Two examples of Envisat ice motion fields, acquired on February 2007, are shown in Figure 2. One example covers a cyclonic circulation along the west coast of Greenland (red arrow) and the other is located in the area next to Davis Strait (blue arrow). Comparative results (Figure 3a) present a mean bias of -0.68 km/day in ice speed between the two records (i.e., slightly slower NSIDC) but a relatively large standard deviation of difference (3.11 km/day). Furthermore, there is a small average difference of 3.4 ° in vector angle (Figure 3b), indicating that the NSIDC motion is likely biased to the right. A large standard deviation exists in the difference of motion vector angle (38 °), which is mostly caused by data pairs for the slower Envisat motions of less than 3 km/day (Figure 3b). Despite these phenomena, the two estimates agree well as a whole, as indicated by the high correlation between them ( $R = 0.87$ ).

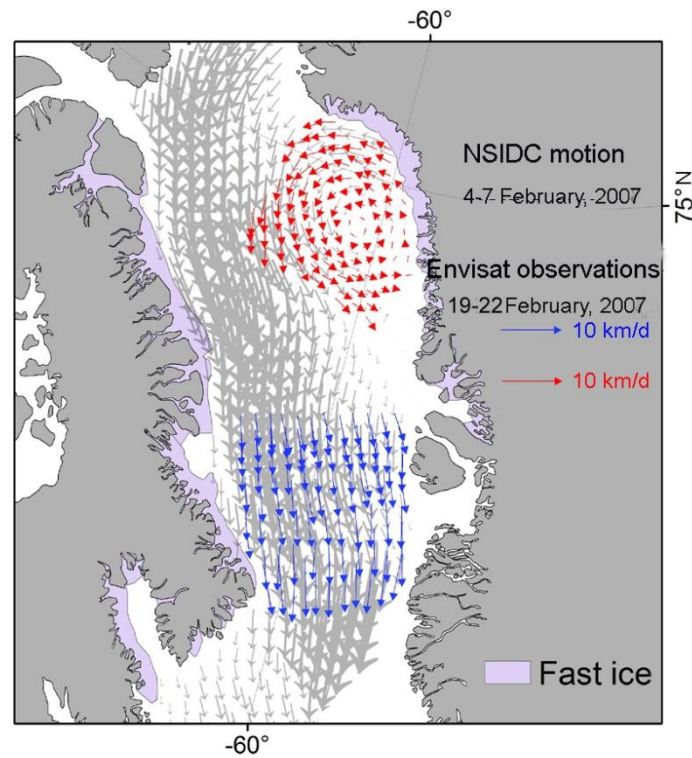

**Figure 2.** Sea ice motion examples from NSIDC and Envisat. Gray arrows corresponds to the NSIDC data on 4~7 February 2007. The superimposed arrows, one for 4~7 February 2007 (red) and the other for 19~22 February 2007 (blue), denote the smoothed Envisat estimates. The in-phase fast ice extent is marked as purple polygons.

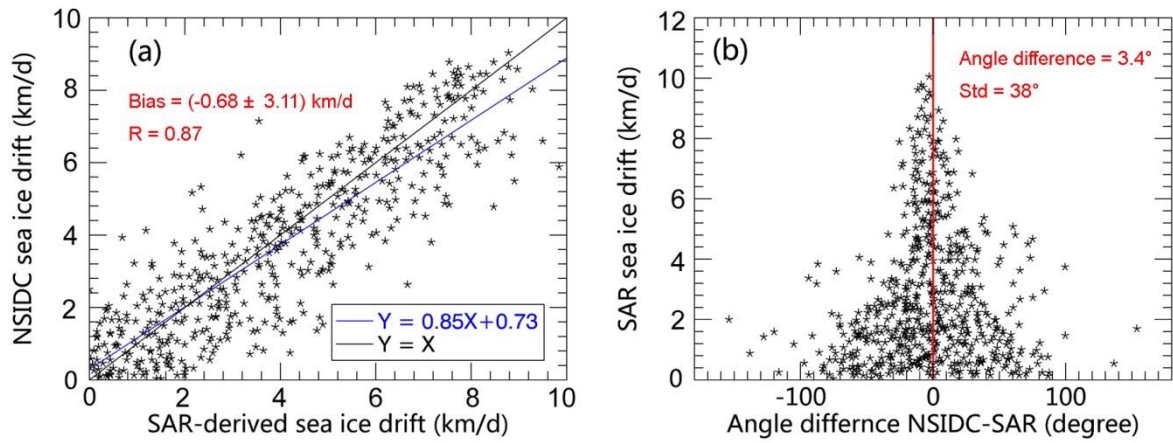

**Figure 3.** Comparison between NSIDC ice motion and Envisat estimates in terms of (a) drifting speed and (b) angular direction.

### 2.1.2 Sea ice concentration

5 Satellite-derived daily sea ice concentration records (1978-2017) were obtained from NSIDC (<http://nsidc.org/data/NSIDC-0079>). These data are derived from the passive microwave observations from SMMR onboard the Nimbus-7, the SSM/I onboard the Defense Meteorological Satellite Program (DMSP) -F8, F11 and F13, and SSMIS aboard DMSP-F17 by the application of Bootstrap algorithm (Comiso et al., 2017a). For the period November 1978 to July 1987 the ice concentration is available every other day. The data gap is filled using a temporal interpolation from the data of the two adjacent days (i.e. the previous and subsequent days). The concentration field utilized here is an up-to-date version (v3.1), offering improved consistency among the estimates from the different sensors through the use of daily varying tie points. Furthermore, the product has been optimized to provide enhanced removal of weather and land contaminations (Cho et al., 1996). The data are available with an equal-area grid cell structure (25 km×25 km) on a polar stereographic projection.

### 2.1.3 Sea ice map of the Canadian Ice Service

15 Weekly sea ice maps were provided by the Canadian Ice Service (CIS). As shown in Figure S1, sea ice classification and concentration in Baffin Bay are depicted in details on the CIS map. The CIS ice map benefits this study in the following three aspects. First, it is useful for identifying sea ice location and coverage for the NWP. Second, it enables the separation of fast ice from floating sea ice. The retrieved CIS fast ice extents are useful for detecting those coastal grid cells where ice motion should be set to zero before the calculation of sea ice area flux. As shown in Figure 4, the eastern and western endpoint grids of the North and South Gates, which is possibly covered by fast ice, is expected to have zero motion. This verification serves to reduce possible systematic errors in the estimation of total area flux. In addition, the fast ice extent identified from CIS can be used to interpret the slower ice motions adjacent to the west coast of Greenland (around 75°N, Figures 2). Third, the CIS map facilitates the identification of ice bridges (or ice arches) which typically form in Nares Strait

(Figure S1). The formation of ice bridge is a common scenario during the cold freezing period in the strait and the CAA channels, which can substantially restrain Arctic sea ice inflow into Baffin Bay. Typically, two distinct bridges form: one at the northern entrance of Nares Strait adjacent to Lincoln Sea (the north bridge) and one near the southern exit of the strait (the south bridge, Figure S1a). The formation of the south bridge can fully restrict the sea ice inflow into northern Baffin Bay, as indicated by the recurring low-concentration regime just downstream of the south bridge (Figure S1b).

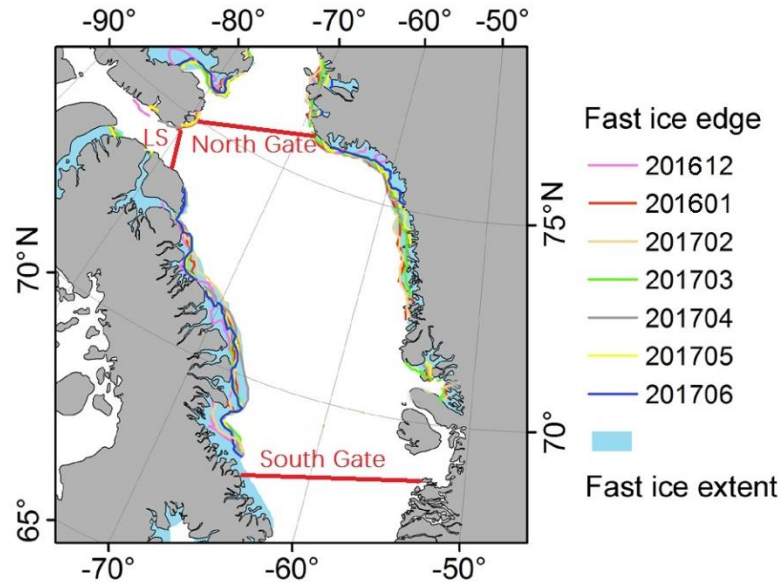

**Figure 4.** Monthly mean fast ice extent obtained from the CIS map for the period from December 2016 to June 2017.

#### 2.1.4 Reanalysis data

The reanalysis data of sea level pressure (SLP) and surface air temperature (SAT), used to analyze the impacts of climate changes on ice area flux, were provided by the National Centers for Environmental Prediction/National Center for Atmospheric Research (NCEP/NCAR) (Kalnay et al., 1996). The data are available with a spatial resolution of  $2.5^{\circ} \times 2.5^{\circ}$ .

### 2.2 Sea ice area flux estimation

#### 2.2.1 Methods to estimate sea ice area flux and its uncertainty

Sea ice area flux is estimated by taking the integral of the product between the gate-perpendicular component of the sea ice motion and concentration across one fluxgate (Kwok, 2007). The area fluxes through the North Gate and the Lancaster Sound (Figure 1) are deemed as the two sea ice inflow components for Baffin Bay. The North Gate (Figure 1), spanning ~320 km in width, is positioned at ~75°N between 79°W and 68°W, where sea ice inflow originates from three components: Jones Sound, Nares Strait, and ice produced from the NWP. Another important source of sea ice inflow is Lancaster Sound, which has a gate width of ~80 km and can be computed with the 25-km NSIDC sea ice fields. In contrast, reliable estimates of sea ice area flux for Jones Sound and Smith Sound are not practical due to their small widths (~40 km) with respect to the

25-km pixel resolution of the NSIDC data. Therefore, the results of several studies of the two gates are used to analyze the possible ice inflow contributions to northern Baffin Bay (see 5.1 for more details). For the outflow component, sea ice area flux across the South Gate is estimated. The gate spans ~480 km and is located at ~68 °N between 63 °W and 53 °W, close to Davis Strait (Figures 1 and 4).

Before computing the area flux, the NSIDC ice motion is first interpolated to a gate to retrieve the gate-perpendicular component of ice motion. Sea ice concentration is used to weight the influences of the open water fractions on the area flux estimates. Following the trapezoidal rule, sea ice area flux ( $F$ ) integrated across a fluxgate is derived as,

$$F = G \sum_{i=1}^{N-1} u_i c_i (i = 1, 2, \dots, N) \quad (1)$$

where  $N$  is the number of along-gate grids.  $G$  corresponds to the width of a grid cell (25 km),  $u_i$  is the perpendicular component of the sea ice motion, and  $c_i$  is the sea ice concentration at the  $i$ -th grid cell. As mentioned above, prior to the calculation, the sea ice motion fields at the endpoints of the fluxgate should be set to zero if they are covered by fast ice as recognized in the CIS maps.

The monthly sea ice area flux is calculated as the cumulative daily flux over a calendar month. Similarly, the annual flux denotes the sum of the monthly area flux of one year (September-August). The errors in the daily area flux estimate can be calculated as follows (Kwok, 2009):  $\sigma_D = \sigma_u L / \sqrt{N_s}$ , where  $L$  is the width of the defined gate,  $\sigma_u$  is the uncertainty in daily motion and  $N_s$  is the number of independent grid cells across the gate (Table 1). For  $\sigma_u$ , we use the uncertainty (3.11 km/day) determined as described above through comparisons with the Envisat ice motion estimates. The uncertainty of monthly area flux is calculated as  $\sigma_m = \sigma_D \sqrt{N_D}$ , where  $N_D$  is the number of days over the month of interest. The annual flux uncertainty is calculated as  $\sigma_a = \sigma_m \sqrt{N_m}$ , where  $N_m = 12$ , i.e., is the number of calendar months from September to the following August, representing a complete seasonal cycle of sea ice growth and decay. The mean uncertainties for different temporal intervals are summarized in Table 1. On average, the annual uncertainties for the North Gate, the South Gate, and LS correspond to small proportions (2.5%, 2.0%, and 2.4%, respectively) of the corresponding annual mean flux estimates (provided in Section 4).

**Table 1.** Mean uncertainty estimates for sea ice area flux in terms of daily ( $\sigma_D$ ), monthly ( $\sigma_m$ ), and annual ( $\sigma_a$ ) fields for the period of 1978/1979-2016/2017.  $N_s$  is the number of grid cells covered by the corresponding gate.

| Passages   | Width (km) | $N_s$ | $\sigma_D$ (km <sup>2</sup> ) | $\sigma_m$ (10 <sup>3</sup> km <sup>2</sup> ) | $\sigma_a$ (10 <sup>3</sup> km <sup>2</sup> ) |
|------------|------------|-------|-------------------------------|-----------------------------------------------|-----------------------------------------------|
| North Gate | 320        | 13    | 276                           | 1.51                                          | 5.2                                           |
| South Gate | 480        | 19    | 414                           | 2.27                                          | 7.86                                          |
| LS         | 80         | 3     | 69                            | 0.38                                          | 1.31                                          |



## 2.2.2 Comparisons with published results

Based on SSM/I estimates of sea ice motion, Cuny et al. (2005) obtained the sea ice area flux from November through May across Davis Strait over the period 1991/1992-1999/2000 (Figure 2, cyan line). During that period, sea ice area outflow was estimated to be  $496 \times 10^3 \text{ km}^2$ . By comparison, our NSIDC-derived flux through the South Gate (close to Davis Strait) for the same winter months of the same period is on average approximately  $380 \times 10^3 \text{ km}^2$ . This large difference can be mainly attributed to the distinct contrast in spatial resolution between the two sea ice motion datasets ( $\sim 70 \text{ km}$  for the SSM/I motion data based on 37 GHz observations versus 25-km pixels for the NSIDC data), since larger uncertainty is expected in flux estimates based on a spatially coarser motion. The expected uncertainty in monthly flux based on SSM/I observations was computed as  $6.52 \times 10^3 \text{ km}^2$ , whereas the uncertainty based on NSIDC motion is  $2.27 \times 10^3 \text{ km}^2$  (Table 1). However, the similarity of interannual behavior between the two sets of records is relatively high ( $R=0.56$ ).

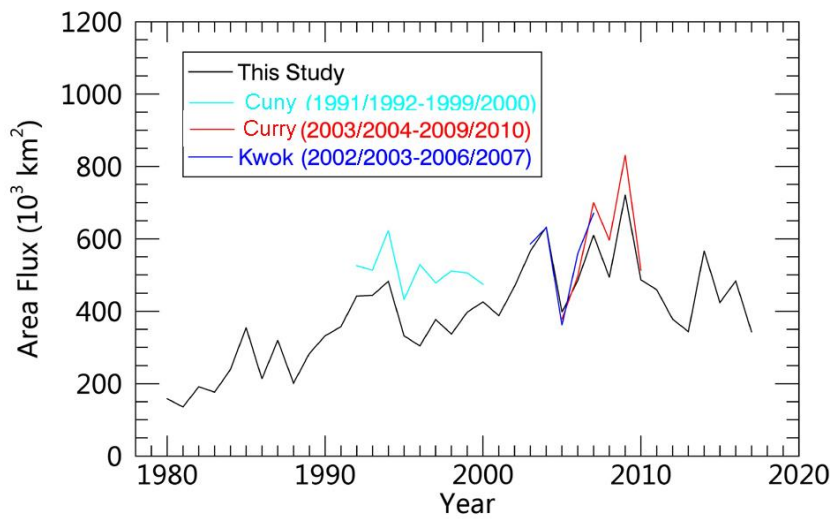

**Figure 5.** Comparison of sea ice area flux (November to the following May) with estimates from Cuny et al. (2005), Curry et al. (2014), and Kwok (2007)

Kwok (2007) used AMSR-E data to examine sea ice drift and export in Baffin Bay over the period 2002/2003-2006/2007. These estimates were extended to 2009/2010 in Curry et al. (2014). On average, our estimate of the sum of ice area flux for the November-to-May period through the South Gate is  $-24.3 (\pm 63.7) \times 10^3 \text{ km}^2$  lower than that provided by Kwok, and  $-45.5 (\pm 61.0) \times 10^3 \text{ km}^2$  lower than Curry's estimate (Figure 5). Quantities after " $\pm$ " are the standard deviation of the difference. Possibly, the differences are primarily caused by the differences in data inputs and slightly due to the small differences in the locations of the defined gates among the different studies. In percentages, the biases are rather small, corresponding to small proportions (4.5% and 8.9%) of the average winter (November- May) estimate based on NSIDC data ( $511 \times 10^3 \text{ km}^2$ ) for the time range between 2002/2003 and 2009/2010. Moreover, good agreement between the interannual variations of the NSIDC-based results and the AMSR-E-based estimates is identified (Figure 5). There is a high correlation



of 0.93 between the NSIDC results and the AMSR-E estimates provided by Curry et al. (2014). Overall, the good consistency with the higher-resolution AMSR-E estimates suggests the results of this study are credible.

### 2.3 Methods to simulate ice thickness changes and investigate the impacts on ice motion

Based on the Zubov ice growth model ( $h^2 + 5h = 8\theta$ , where  $\theta$  is  $C_{Fd} - 3C_{Md}$ , where  $C_{Fd}$  and  $C_{Md}$  are the cumulative degrees of SAT for freezing and melting days, respectively; for the ice growth period,  $C_{Md}$  is set to 0), we obtain preliminary estimates of the ice thickness changes in Baffin Bay. The value of  $C_{Fd}$  for an ice growth period can be derived from the NCEP/NCAR reanalysis SAT product. To define a freezing day, we follow Stroeve et al. (2014).

Changes in sea ice thickness impact the sea ice motion fields. To assess the ice motion changes when ice thickness is altered, the standard Quadratic drag laws (Equation 2) are used to examine the ice floe acceleration due to wind ( $\tau_a$ ) and current forcing ( $\tau_w$ ) as follows,

$$\begin{aligned}\tau_a &= \frac{\rho_a C_a}{\rho_i h_i} |\mathbf{V}_a - \mathbf{V}_i| (\mathbf{V}_a - \mathbf{V}_i) \\ \tau_w &= \frac{\rho_a C_a}{\rho_i h_i} |\mathbf{V}_w - \mathbf{V}_i| (\mathbf{V}_w - \mathbf{V}_i)\end{aligned}\quad (2)$$

where  $\rho_a$  is air density,  $C_a$  is the air-ice drag coefficient,  $V_a$  is the wind velocity vector,  $\rho_a$  is the seawater density,  $C_w$  is the water-ice drag coefficient,  $V_w$  is the surface ocean velocity vector,  $\rho_i$  is the sea ice density, and  $h_i$  is the ice floe thickness.

### 2.4 Sea ice divergence approximation

To gain further insight into the sea ice production due to the ice dynamics in Baffin Bay (see section 4.2 for more details), the divergence ( $\nabla \cdot \vec{V}$ ) of the sea ice motion vector field is calculated. The derivative of the ice motion field in the x and y direction is calculated by use of the Sobel operator. The Sobel operator is convoluted with the x and y components  $V_x$  and  $V_y$  of the ice motion field to calculate the divergence,

$$\nabla \cdot \vec{V} = \frac{1}{8} \begin{bmatrix} 1 & 0 & -1 \\ 2 & 0 & -2 \\ 1 & 0 & -1 \end{bmatrix} * V_x + \frac{1}{8} \begin{bmatrix} 1 & 2 & 1 \\ 0 & 0 & 0 \\ -1 & -2 & -1 \end{bmatrix} * V_y \quad (3)$$

where  $*$  is the convolution operator. The Sobel operator smoothes the field perpendicular to the derivation direction.

## 3. Sea ice conditions in Baffin Bay

### 3.1 Sea ice coverage

The characteristic features (2016) of annual sea ice coverage of Baffin Bay are shown in Figure 6. The bay is generally ice-free between July and October. From November, the coverage advances rapidly from the west to the east and, from the north to the south. It reaches maximum coverage in later winter (March). The retreat westward around the South Gate starts in April. The southerly circulation and the warm WGC are responsible for the lower ice cover in the east of the South Gate

(Figure 1). The identifiable low sea ice concentration fields in the northern part during the cold months are associated with the occurrence of NWP (such as in April in Figure 6).

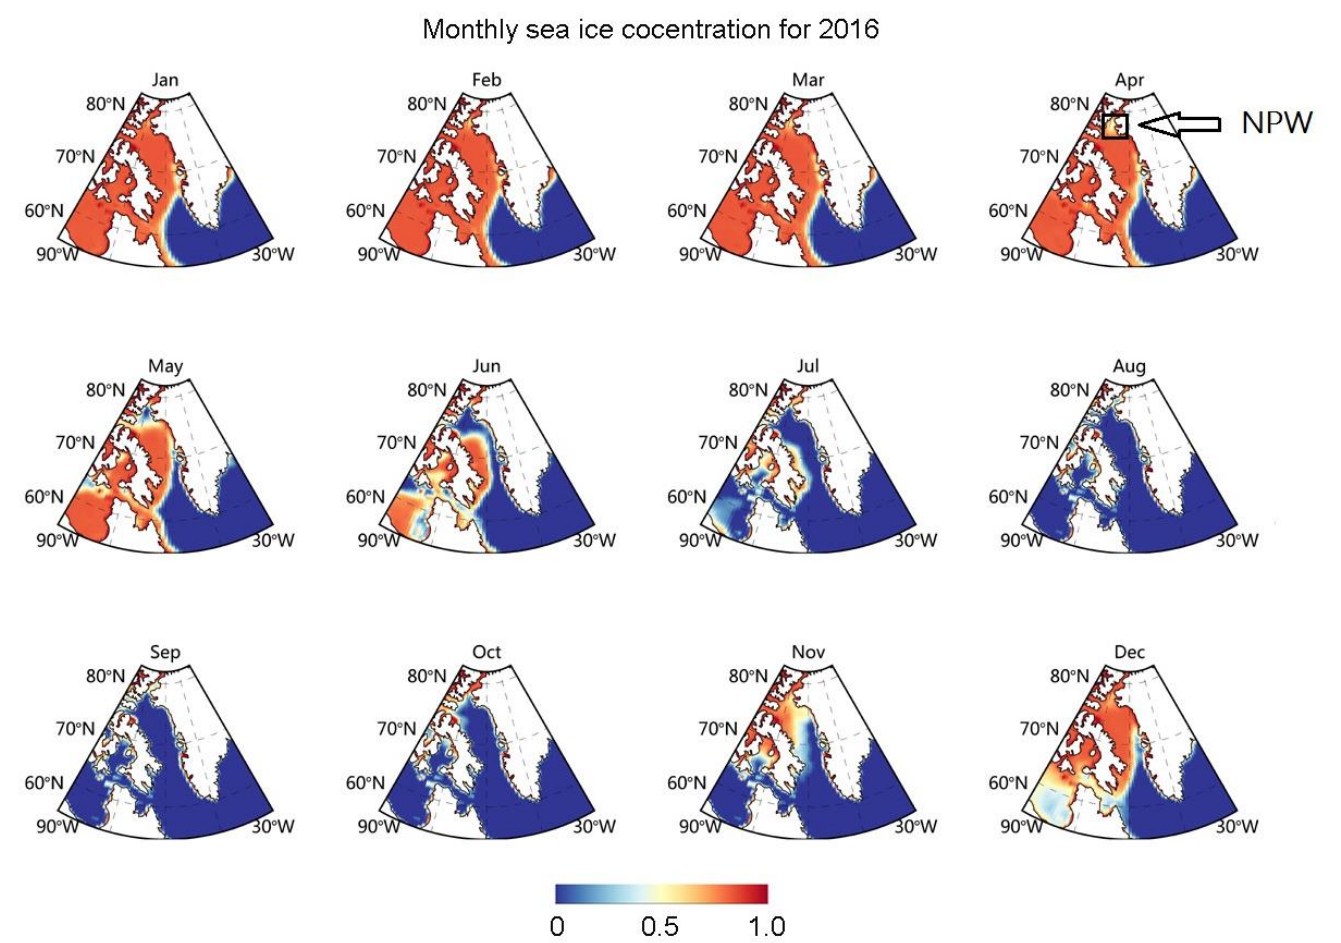

**Figure 6.** Spatial variations of mean sea ice concentration fields for the calendar months in 2016. In the panel for April, NWP is outlined.

### 3.2 Sea ice drift pattern

Two selected examples of sea ice drift in Baffin Bay are shown in Figure 7. The March and June cases in 2016 are chosen to represent ice circulation under cold and warm conditions, respectively. Overall, sea ice drift in Baffin Bay is characterized by a cyclonic pattern. To the west, the sea ice motion (Figure 7a) is connected to the northerly Baffin Current (BC, Figure 1). To the east, the slower drift (Figure 7a) and even southerly drift (Figure 7b and Figure 2), especially in the northeast corner of the bay (around 75 °N), is associated with the southerly West Greenland Current (WGC, Figure 1).

In March, the prevailing drift pattern in the bay is southward (Figure 7a). Sea ice starts from Smith Sound and the south end of Nares Strait and extends southward along the coast of Baffin Island. From the northern end of the bay to Davis Strait, the sea ice motion gradually accelerates, reaching the maximum speeds around Davis Strait (Figure 7a). The mean sea ice speed in the North Gate is 3.2 km/day, whereas sea ice in the South Gate attains a speed of 8.5 km/day. Moreover, the CIS map demonstrates that the thicker multiyear ice from either the Arctic through Nares Strait (Figure S4a) or Lancaster Sound

(Figure S4b) is mostly confined to the west of the bay. In contrast, most of the ice motion fields in June have decreased sharply to less than 0.8 km/day, but the basin-scale cyclonic pattern is still observable (Figure 7b).

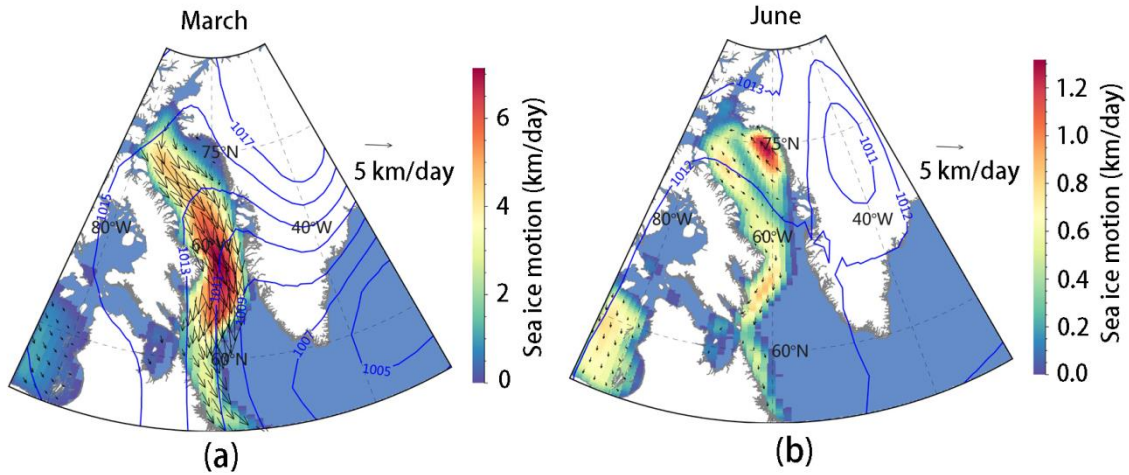

**Figure 7.** Sea ice drift patterns (arrows) in (a) March and (b) June 2016. Background color denotes the magnitudes of sea ice speeds. Superimposed bold curves represent the SLP distribution patterns of the corresponding month.

The general cyclonic sea ice movement pattern can be attributed to the wind forcing associated with the SLP distribution (blue curved lines in Figure 7). The associated denser isobars in the bay imply a stronger geostrophic wind flow in March (Figure 7a). The deep SLP trough (as apparent in March, Figure 7a) begins to emerge in October (not shown) and is gradually enhanced until the end of March. The trough enters to a weak stage from April until the end of summer, as evident in June in Figure 7b. The spatial distribution of the trough in June is responsible for the remarkable features of ice circulation, such as the southeasterly flows in the northeast part of the bay and the northwesterly flows in Davis Strait (Figure 7b). Owing to modulation by the structure of the coastline, the actual sea ice drift direction in the bay tends to be on the right of the isobars (Figure 7a).

### 3.3 Trends in sea ice motion and concentration fields

During cold seasons over the period 1978/79-2016/17, the sea ice concentration fields in Baffin Bay show a basin-scale average declining trend ranging from -1.2%/de (winter, December-February, Figure 8a) to -3.1%/de (spring, March-May, Figure 8b). During the warm seasons (summer: June-August; autumn: September- November), the sea ice decrease is stronger, with an average change rate of -10.4% (not shown). Clear regional variations in the trend fields are apparent in Figure 8. Around the southeastern edge during the winter period, sea ice retreats northward and eastward, with a significant decreasing trend in ice concentration, in excess of -10%, relative to the 2.8%/de decline reported earlier along this edge for the period 1951-2001 (Stern and Heide-Jørgensen, 2003). However, sea ice concentration in other regions of the bay shows a quite declining trends weaker than -2.0%/de (Figure 8a).

A small enclosed area of the NWP region in the north end of the bay also displays a declining trend in sea ice concentration fields (Figure 8a and 8b). In the NWP region, there is an average sea ice concentration decrease in winter

(-3%/de) and a stronger decrease during spring (-8%/de). This seasonal difference is primarily associated with the appearance of the ice bridge near the Smith Sound in late winter or early spring (February or March). More new ice can be produced from NWP during the spring period than the winter, and the recurring ice bridge can largely recede into the ice inflow from the Nares Strait into Baffin Bay. Therefore, higher fractions of the sea ice inflow component originating from NWP production seem to occur in spring than in winter. The more recently-produced ice thus contributes to the observed fields of lower concentration in the NWP region in spring (Figure 8b). Additionally, the decline in sea ice concentration in the NWP seems to be partially associated with the southward sea ice motion (Figure 9a and 9b). In the broad regions just south of the NWP, the increased southward ice advection provides more chances for the creation of newly-formed ice in polynyas. Therefore, the enhanced southward ice advection through Baffin Bay (~1.0 km/d/de) may also have contributed to the decrease in ice concentration over the NWP regime.

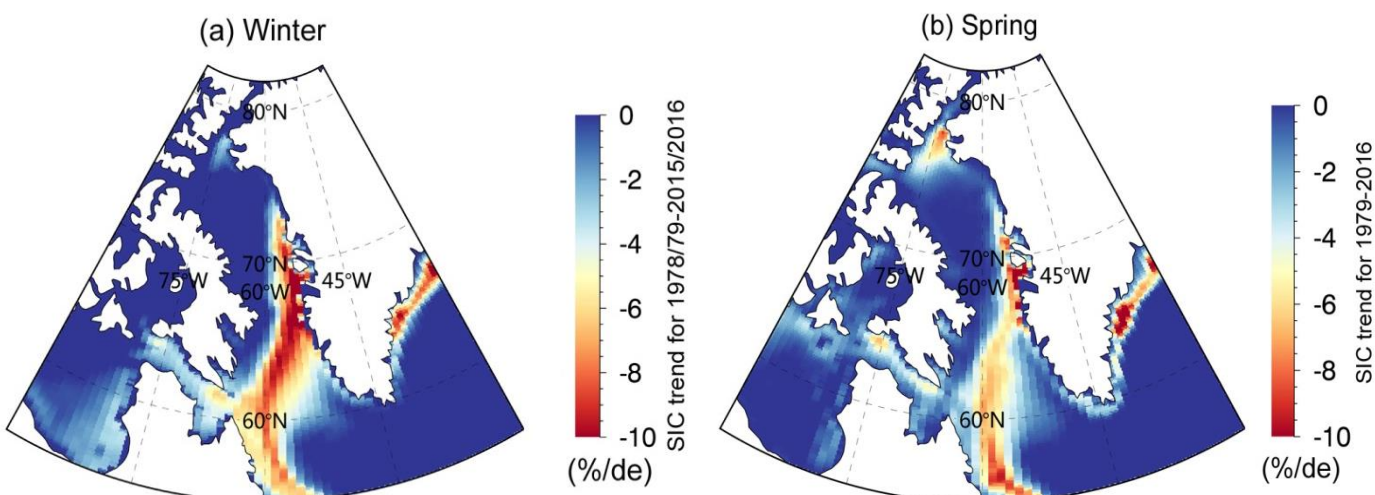

**Figure 8.** Sea ice concentration trends during (a) winter and (b) spring over the period 1978/1979-2016/2017.

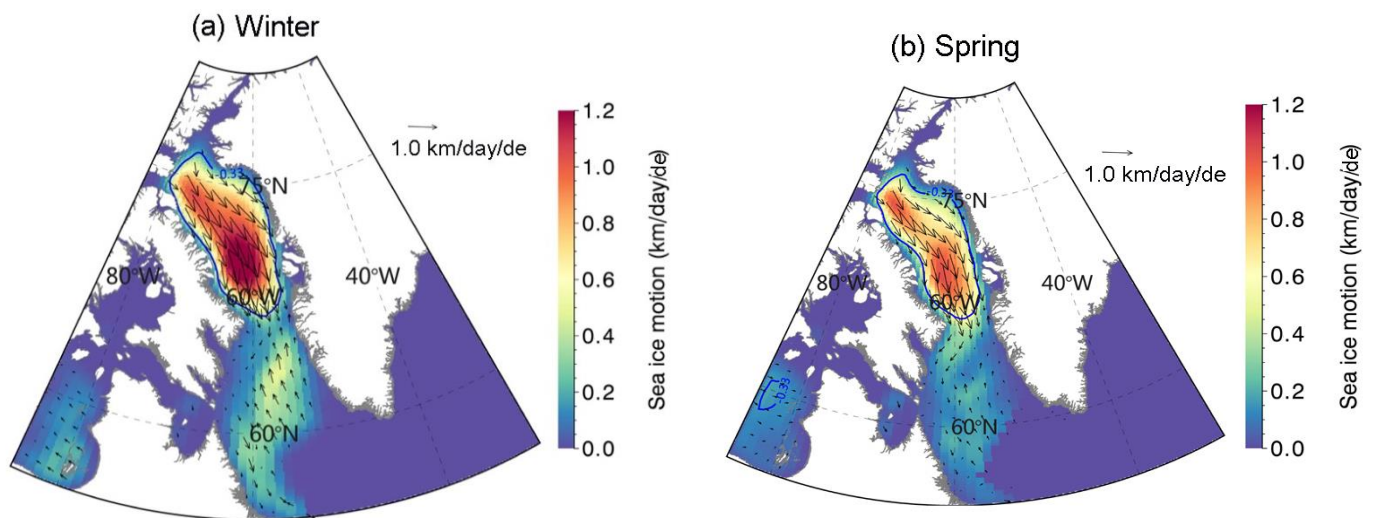

**Figure 9.** As Figure 8 but for sea ice motion fields.

#### 4. Sea ice flux through different fluxgates in Baffin Bay

In this study, sea ice area flux across three gates is obtained. Sea ice inflows to the bay are measured across the North Gate and Lancaster Sound, and the sea ice outflow is estimated across the North Gate (Figure 4). The obtained sea ice flow budget (outflow-inflow) provides knowledge of sea ice production or loss associated with the dynamic and thermodynamic processes in the regions between the South and North Gates.

##### 4.1 Monthly variability of sea ice area flux

Figure 10 shows the monthly mean sea ice area export at the three gates over the period 1978/79-2016/2017. Large monthly variations in sea ice area flux are observed. The average monthly inflow through the North Gate is  $17.2 \times 10^3 \text{ km}^2$ , with monthly inflow ranging between  $-0.04 \times 10^3 \text{ km}^2$  (August) and  $39.4 \times 10^3 \text{ km}^2$  (January) (Figure 10a). The sea ice flux across the South Gate is greater (Figure 10b). For this gate, the mean monthly export is  $32.9 \times 10^3 \text{ km}^2$ , nearly twice of that the North Gate, and varies from  $-0.13 \times 10^3 \text{ km}^2$  (August) to  $80.0 \times 10^3 \text{ km}^2$  (January). In comparison, the sea ice area flux across Lancaster Sound is smaller than that of either gate, with an average of  $4.6 \times 10^3 \text{ km}^2$  and a range of zero flux (August) to  $\sim 10.0 \times 10^3 \text{ km}^2$  (December) (Figure 10c).

The seasonal behaviors of monthly flux for the three gates are similar (Figure 10). In general, the sea ice area flux for the warm period from June to October is low and sometimes reaches to zero. For the cold period from November through next May, it is much larger and varies significantly. Furthermore, there are clear decadal changes as observed for the cold months (November-May). Relative to monthly sea ice flux during the cold months in the first decade (1978-1987), enhanced monthly sea ice flux is observed for the subsequent three decades (since 1988), with average flux values of  $\sim 20 \times 10^3 \text{ km}^2$  through the North Gate (Figure 8a),  $\sim 50 \times 10^3 \text{ km}^2$  through the South Gate (Figure 8b), and  $\sim 5 \times 10^3 \text{ km}^2$  through Lancaster Sound (Figure 8c). Among the recent three decades, the monthly sea ice flux remains high and does not show significant interdecadal variation.



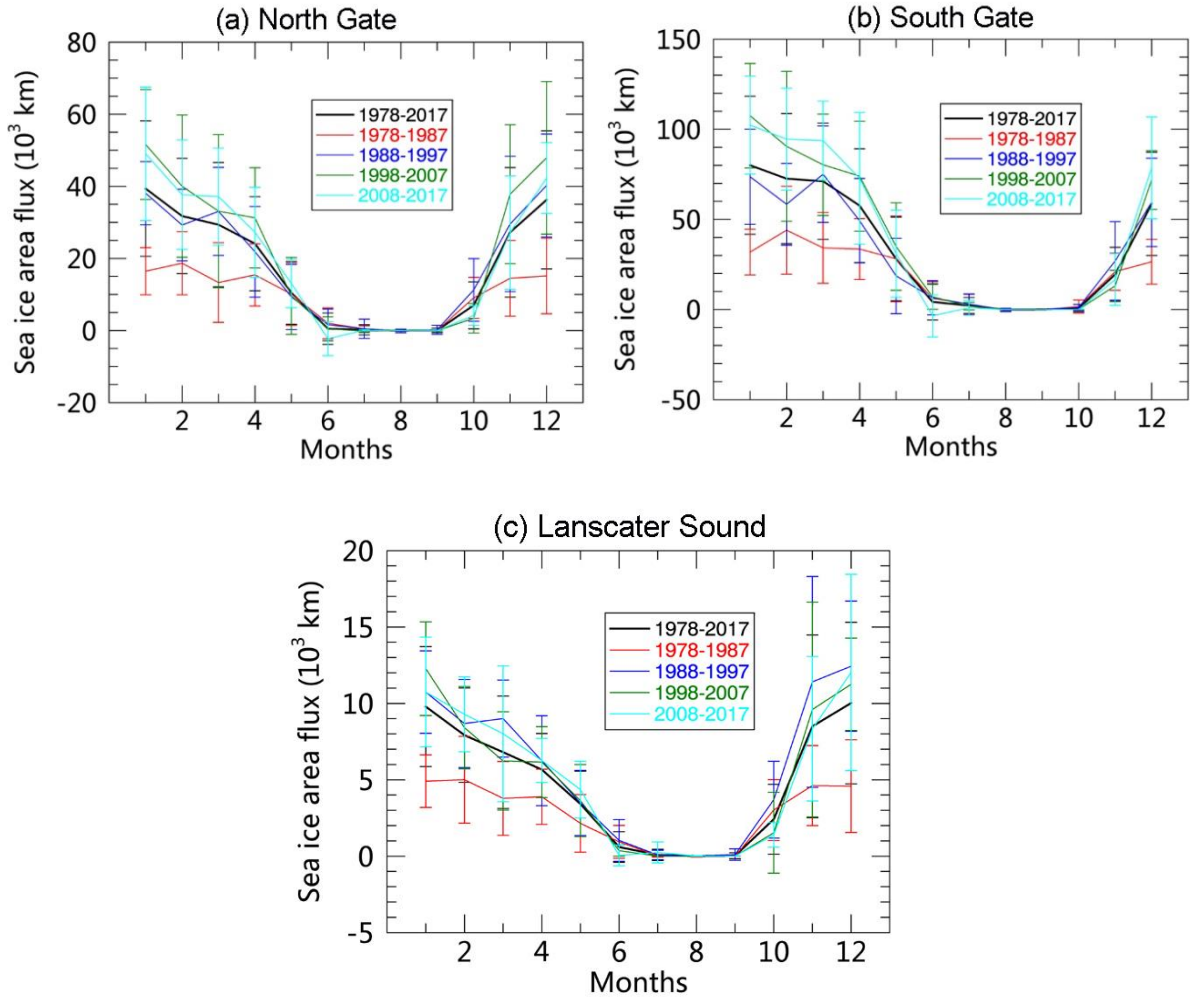

**Figure 10.** Monthly mean sea ice area export in (a) the North Gate, (b) the South Gate, and (c) Lancaster Sound. Both the climatology (1978/1979-2016/2017) and decadal mean fields are given in the panels.

#### 5 4.2 Variability and trends of seasonal and annual inflow and outflow

Figure 11 shows the seasonal and annual sea ice area flux across the three gates. The seasonally accumulative flux fields are obtained for the months of spring (March-May), summer (June- August), autumn (September-November), winter (December-February). The annual sea ice flux refers to the sum of monthly flux from September to next August.

Distinct interannual variations is evident in the annual sea ice flux fields as well as the winter and spring fluxes (Figure 11). Table 2 shows that the average annual inflow across the North Gate is  $205.8 (\pm 74.7) \times 10^3 \text{ km}^2$ , with minimum annual inflow in 1980/1981 ( $64.1 \times 10^3 \text{ km}^2$ ) and maximum annual inflow ( $414.8 \times 10^3 \text{ km}^2$ ) in 2006/2007. The South Gate shows a mean annual outflow of  $394.3 (\pm 110.2) \times 10^3 \text{ km}^2$ , with annual outflow ranging between  $140.6 \times 10^3 \text{ km}^2$  (1980/1981) and  $727.4 \times 10^3 \text{ km}^2$  (2008/2009). The mean annual inflow through Lancaster Sound is  $55.2 (\pm 17.8) \times 10^3 \text{ km}^2$ , with outflow varying between  $20.7 \times 10^3 \text{ km}^2$  (1978/1979) and  $94.3 \times 10^3 \text{ km}^2$  (2014/2015). The difference between the inflow (through the North Gate and Lancaster Sound) and outflow (through the South Gate),  $-133.3 \times 10^3 \text{ km}^2$ , is suggestive of annual net loss of sea ice area in the regions between  $\sim 65^\circ \text{N}$  and  $\sim 75^\circ \text{N}$  in Baffin Bay.

We obtain a total sea ice inflow of  $214.7 \times 10^3 \text{ km}^2$  during the cold seasons (winter and spring) through the North Gate and Lancaster Sound and an outflow of  $368.0 \times 10^3 \text{ km}^2$  via the South Gate. The difference of  $153.3 \times 10^3 \text{ km}^2$  is largely balanced by newly-formed ice within the bay, revealing the Baffin Bay itself as an important source regime of sea ice. Using  $\sim 690 \times 10^3 \text{ km}^2$  as the area of Baffin Bay, this newly formed ice within the bay represents a noteworthy fraction of 22.2% of the coverage of Baffin Bay. As mentioned above, the sea ice motion fields in the bay gradually increase from north to south (Figure 7a), resulting in a distinct ice speed gradient and possibly the occurrence of new leads (not shown). Therefore, the sea ice dynamics of the central and western regions of the bay are dominated by a sea ice diverging pattern (as exemplified in Figure 12) where new ice can form from the freezing process in leads. For the warm period (summer and autumn), both sea ice inflow ( $46.3 \times 10^3 \text{ km}^2$ ) and outflow ( $26.3 \times 10^3 \text{ km}^2$ ) are small. The difference of  $-20.0 \times 10^3 \text{ km}^2$  represent net sea ice loss that is likely due to enhanced melting in the bay. This finding emphasizes that Baffin bay serves as an important ice sink area during the warm seasons.

**Table 2.** Seasonal and annual mean sea ice area flux across different gates. (Unit:  $10^3 \text{ km}^2$ )

| Passages   | Spring | Summer | Autumn | Winter | Annual |
|------------|--------|--------|--------|--------|--------|
| North Gate | 63.8   | 0.63   | 34.08  | 107.3  | 205.8  |
| LS         | 15.9   | 0.68   | 10.9   | 27.7   | 55.2   |
| South Gate | 156.8  | 6.2    | 20.1   | 211.2  | 394.3  |

Note: Spring (March-May); Summer (June-August); Autumn (September-November); Winter (December-February); Annual (September-August).

Figure 11 shows that all three gates experienced significant positive trends in annual flux over the past four decades, with the major contributions originating from the flux increases during the cold seasons (winter and spring). The trend for the North Gate, approximately  $38.9 \times 10^3 \text{ km}^2/\text{de}$  (or 19.0%/de), is significant (Figure 11a). The percentage trend denotes the fractional change relative to the climatological estimate of flux for 1978/1979-2016/2017. A larger annual increase of  $82.2 \times 10^3 \text{ km}^2/\text{de}$  (or 21.1%/de) is observed for the South Gate (Figure 11b). The increase of ice flux through Lancaster Sound,  $7.5 \times 10^3 \text{ km}^2/\text{de}$  (or 13.6%/de), is small but significant (Figure 11c). All these trend estimates have passed the 99% confidence test. Therefore, the increased sea ice outflow across the South Gate has been partly compensated by the enhanced inflows via the North Gate and Lancaster Sound. The increased outflow across this gate is also partially compensated by the increased occurrence of new ice area formed within the bay.



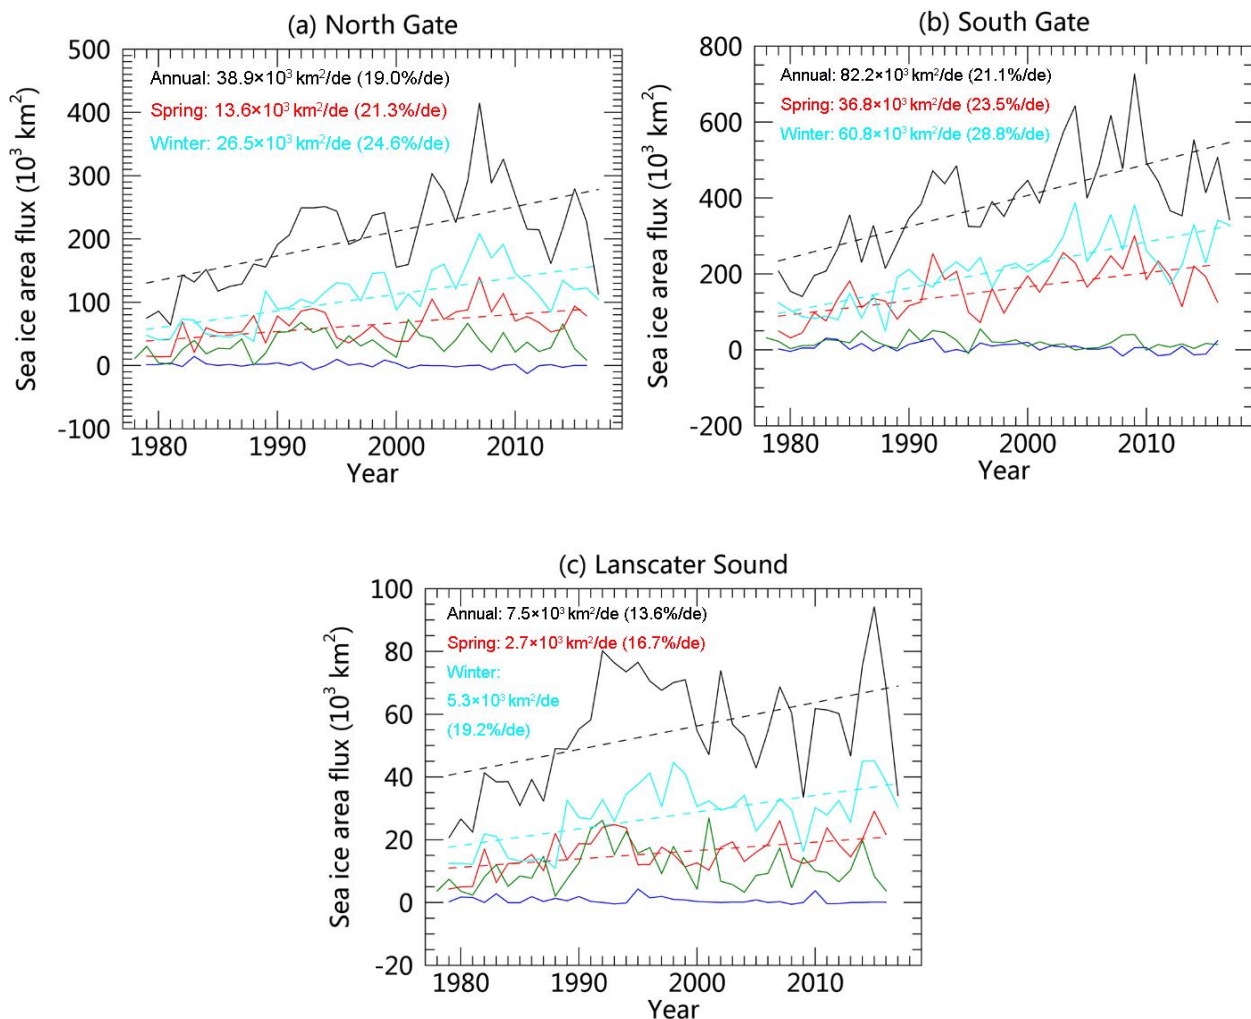

**Figure 11.** Time series of annual (September-August) sea ice area flux (black bold line) across (a) the North Gate, (b) the South Gate, and (c) Lancaster Sound. Seasonal flux is estimated for winter (December – February, cyan line), spring (March-May, red line), summer (June-August, green line), and autumn (September-November, blue line). The dashed lines represent the linearly fitted trends. The annual and cold-season (winter and spring) trends are all significant at the 99% level. However, for the warm seasons (summer and autumn), the trends are not statistically significant and are not shown in the panels.

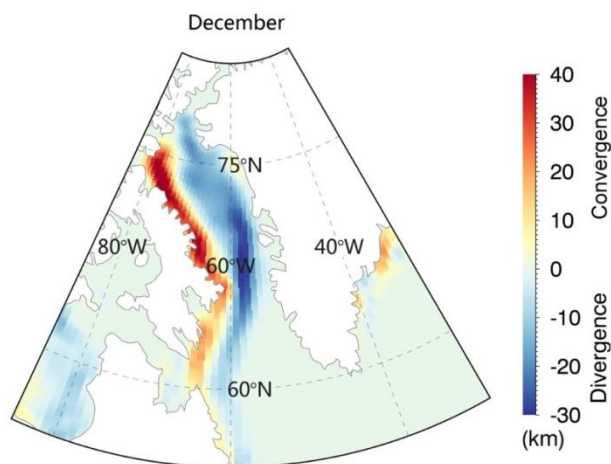

**Figure 12.** Divergence/convergence fields derived from the climatological (1978/1979-2016/2017) sea ice motion vector fields in December using Equation 3.

## 5. Discussion

### 5.1 Possible sources of sea ice inflow into northern Baffin Bay

- 5 There sources contribute to the ice area changes in northern Baffin Bay, i.e. the area flux through the North Gate: (1) inflow from the Arctic Ocean through Nares Strait; (2) inflow from the Canadian Arctic Archipelago (CAA) across Lancaster Sound and Jones Sound (JS); and (3) ice production in NWP in the bay;

#### 5.1.1 Nares Strait sea ice inflow through Smith Sound

Sea ice transport in Nares Strait is controlled by the formation of ice bridges in Nares Strait. As reported based on  
10 RADARSAT SAR imagery by Kwok (2007), ice bridges form due to increases in the strength of ice arches in the middle to late winter, and collapse due to warm temperatures in early summer. Arching is commonly observed in Kane Basin to the south end of Nares Strait and another occurs in the north end. Over a 13-year period (1997-2009), the South arch formed in all years except 2009, whereas half of the winters lacked the North arch (Kwok, 2007). The formation of the South arch may depend on upstream ice conditions, and the formation of the North arch in the northern inlet of Nares Strait may be  
15 favored by the creation of the South arch. The locations of the two ice arches are shown in Figure S1a.

It is clear that when the south arch forms, there exist conditions where sea ice inflow through Nares Strait into the Baffin Bay is strongly restricted under some conditions. Seasonal stoppages of Nares Strait ice flux into Baffin Bay are associated with the formation of the South arch. The immediately mitigating effects due to the formation of ice bridges are apparent from the cases in 2007. During that winter, no locations had conditions suitable for the formation of ice bridges, and area  
20 flux through Nares Strait reached to a record high ( $87 \times 10^3 \text{ km}^2$ ). This large outflow accounted for 21.0% of the annual ice flux ( $414.8 \times 10^3 \text{ km}^2$ ) through the North Gate of Baffin Bay in 2006/2007.

Owing to the small width of Smith Sound (~30 km), the sea ice area flux through Nares Strait cannot be accurately estimated using the coarse NSIDC drift data (25-km resolution) which may be subject to coastal contamination. With high-resolution SAR ice motion data (sampled on a 5-km grid), Kwok (2005) and Kwok et al. (2010) obtained Arctic sea ice  
25 inflow through Nares Strait. They estimated an average annual (September-August) ice area flux of  $33 \times 10^3 \text{ km}^2$  for a six-year period (1996-2002) and an annual average area flux of  $42 \times 10^3 \text{ km}^2$  for a longer, 13-year period (1996-2009). Therefore, sea ice area export via Nares Strait into northern Baffin Bay between 1996/97 and 2008/2009 may contribute a notable fraction (23.3%) of the total ice area flux via the North Gate for the same period ( $280.2 \times 10^3 \text{ km}^2$ ).

### 5.1.2 Sea ice inflow from the Canadian Arctic Archipelago

The sea ice exchange between the CAA and Northern Baffin Bay mainly through Lancaster Sound and the Jones Sound. However, sea ice inflow from the two sounds to the Baffin Bay is difficult to quantify. In an early study for the 1970s, Dey (1981) roughly estimated the average annual inflows of  $170 \times 10^3 \text{ km}^2$  and  $20 \times 10^3 \text{ km}^2$  for the Lancaster and Jones Sounds, respectively. The sea ice motion fields used were derived from diverse sources, including coarse satellite imagery, airborne observations measurements, as well as field measurements. Therefore, their estimates only correspond to a rough estimate.

In a recent study, Agnew et al. (2008) applied a spatially enhanced AMSR-E sea ice motion (13.5 km) to assess the sea ice area flux across CAA for the period from 2002/2003 to 2006/2007. During the 5-year period, sea ice is exported  $68 \times 10^3 \text{ km}^2$  for each year across the Lancaster Sound into Baffin Bay. By contrast, the average sea ice inflow across Jones Sound approaches to zero. In our estimate, the Lancaster Sound sea ice inflow is estimated to be  $58.2 \times 10^3 \text{ km}^2$  for the same period, which is comparable to the Agnew's results based on the AMSR-E imagery. Therefore, the Lancaster Sound constitutes one of important ice sources for the sea ice into the Northern Baffin Bay.

### 5.1.3 Sea ice production in North Water Polynyas

The NWP is a distinct feature in northern Baffin Bay. As shown in Figure 6, it usually occupies an area in the north end of Baffin Bay (north of  $75^\circ \text{N}$ ) and serves as a large ice production area during freezing periods. As mentioned above, its emergence is largely attributable to the formation of an ice bridge in the south end of Nares Strait (Figure S1a) which controls the sea ice inflow. Maintained by strong northerly winds and ocean currents, this large polynya is frequently exposed, and new sea ice grows within it; this new ice is then transported southward. Based on previously reported CAA inflow through Smith Sound ( $42 \times 10^3 \text{ km}^2$ ) and Jones Sound ( $0 \sim 20 \times 10^3 \text{ km}^2$ ), we obtain a preliminary estimate of annual mean area production in the NWP ( $218 \sim 238 \times 10^3 \text{ km}^2$ ) for the period 1996/1997-2008/2009. To obtain this estimate, sea ice from the two inflow sources are subtracted from the mean annual ice flux of the North Gate ( $280.2 \times 10^3 \text{ km}^2$ ) of the corresponding period. The results suggest the major part (approximately 78~85%) of the sea ice entering via the North Gate is likely produced in the polynya.

## 5.2 Connections to cross-gate sea level pressure gradient

If free drift conditions are allowed, sea ice motion is mainly wind-driven and parallel to the sea level pressure isobars (Thorndike and Colony, 1982). In this study, the response of daily sea ice flux to the cross-gate pressure gradient was investigated. The gradient is defined as the difference of mean sea level pressure (SLP) between the east and west endpoints of each fluxgate. The positive (negative) gradient corresponds to positive (negative) sea ice flux. The data pairs of SLP gradient difference and ice area flux for each gate are shown in Figure 13. Clearly, the cross-gate SLP difference is a good predictor of the variance of sea ice flux for the North (Figure 13a) and South Gates (Figure 13b), with a correlation of 0.62

and 0.68, respectively. These correlations are statistically significant at the 99% confidence level. The stronger slope in the South Gate (0.27) is suggestive of an ice condition that is thinner and perhaps closer to free drift than that of the North Gate (0.23). Lancaster Sound, however, reveals an overall counter gradient ice motion ( $R = -0.23$ ), although it is not significant (Figure 13c). Sea ice in this narrow channel is largely controlled by internal ice stresses caused by local sea ice interactions and orographic conditions. As a consequence, sea ice floes in the sound can not move as freely as those in the interior part of Baffin Bay.

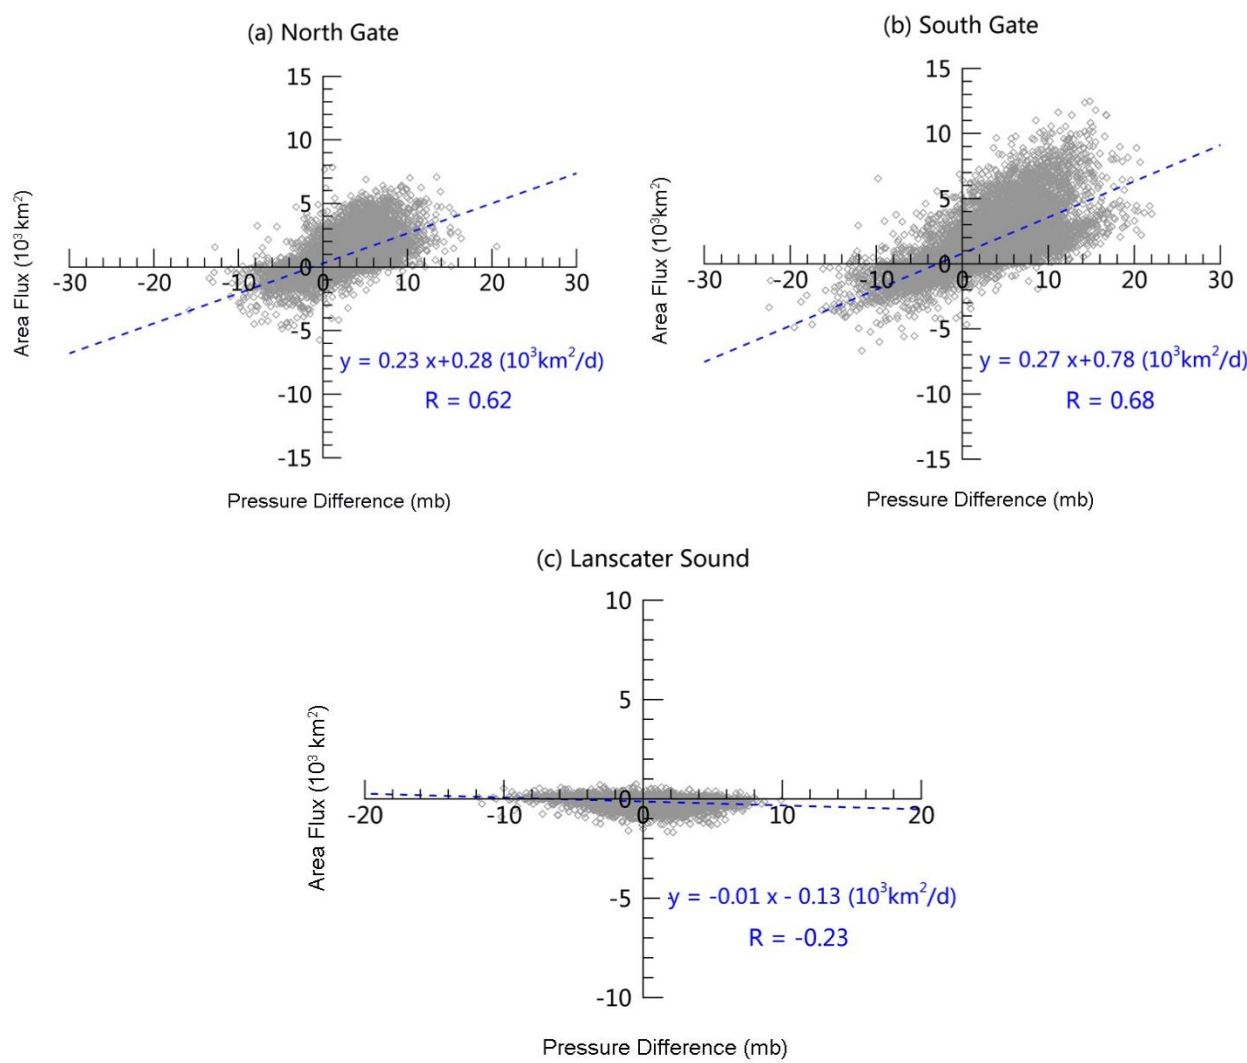

**Figure 13.** Scatterplot of daily sea ice area flux and cross-gate pressure differences for (a) the North Gate, (b) the South Gate, and (c) Lancaster Sound.

### 5.3 Causes of the enhanced sea ice area flux

#### 5.3.1 Potential contribution of geostrophic winds

According to Equation 1, sea ice motion and concentration are the two essential input parameters to estimate area flux. Potentially, their changes would be reflected in the variations of flux. Figure 14 depicts the interannual variations and trends of the two relevant sea ice parameters for the cold seasons (winter and summer) at the North and South Gates. As mentioned

above and shown in Figure 11, all three fluxgates show significant increases in sea ice area flux during the cold seasons. This is mainly caused by the increasing trend in sea ice motion (Figure 14). On the other hand, the decreasing trend in sea ice concentration may contributed negatively to ice area flux. The trends are all significant at the 99% level. The increasing or decreasing trends of different parameters at each fluxgate in the context of the entire bay are illustrated in Figures 8 and 9.

Figure 14 displays the records of cross-gate SLP difference (red bold line), a proxy for the strength of geostrophic winds. Although the SLP difference is a good predictor of the interannual variability in ice motion (see section 5.2 for more details), it does not show any significant trend over the nearly 40-yr period. This observation eliminates wind force as a main driver of the positive trends in ice motion and area flux fields.

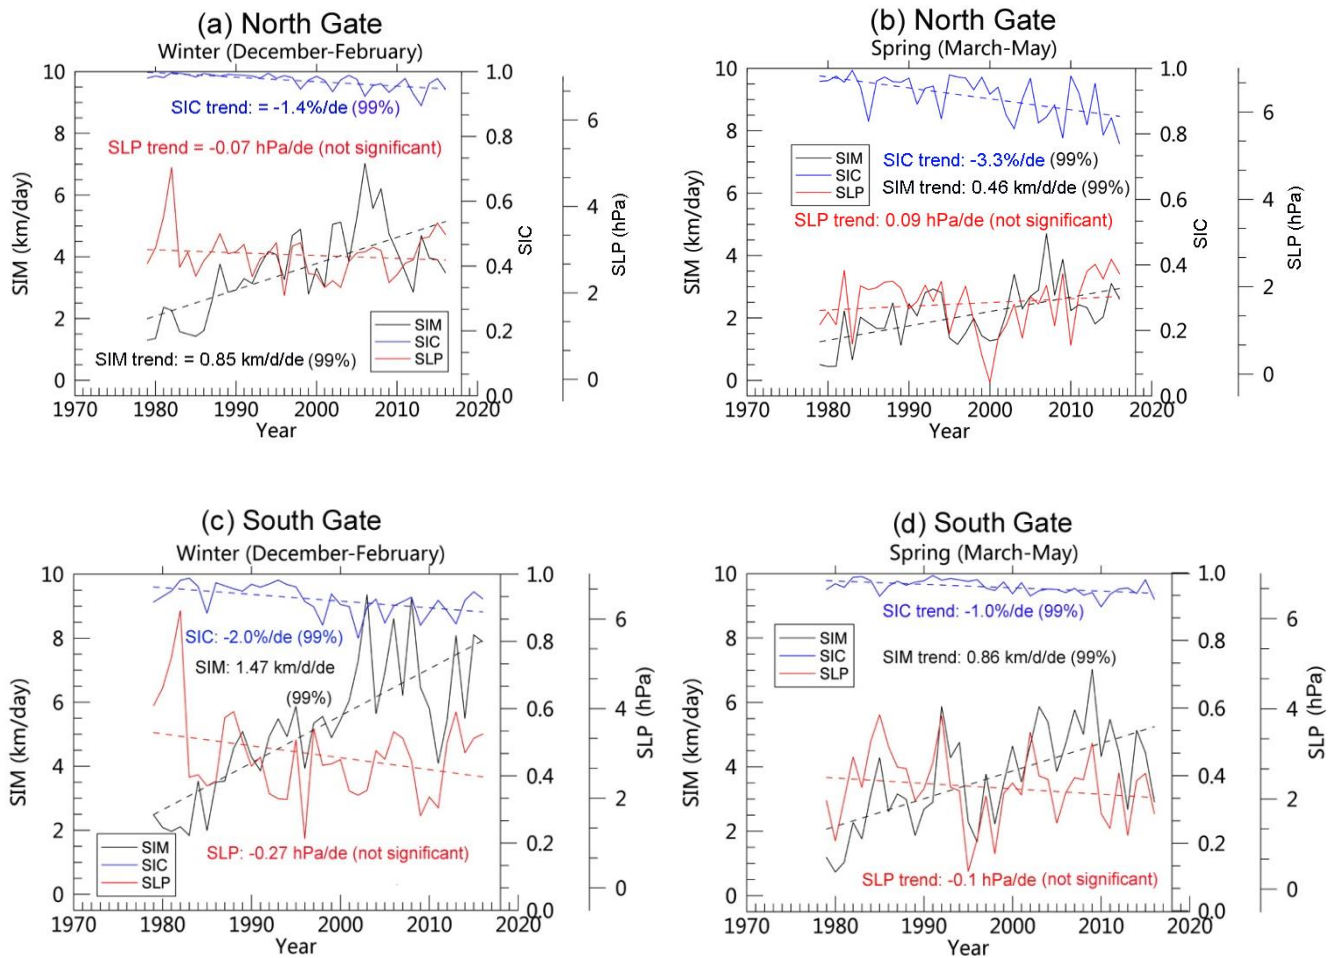

**Figure 14.** Trends and variability of cross-gate mean sea ice motion (black bold line) and concentration (blue bold line) for the (a) North Gate and (b) South Gate. The linear fit line for each parameter is shown as a dashed line. Cross-gate sea level pressure (SLP) difference (red) is shown to facilitate the analysis of causes of the significant trends in sea ice motion.

### 5.3.2 Changes in sea ice

Here we examine the changes of sea ice itself, specifically, (1) the changes in sea ice concentration and (2) the changes in sea ice thickness. A reduced sea ice concentration is expected to cause a decreased area flux across the fluxgates. On the other hand, it implies a less compacted ice pack and facilitates sea ice drift and, perhaps, an increase in area flux. Despite the

decline in sea ice concentration at each gate during the cold periods, the sea ice generally remains at a compact level above 90% (Figure 14), at which large ice internal ice stress is still expected. Therefore, sea ice concentration changes cannot be a primary driver of the enhanced ice motion and area flux.

Due to the scarcity of direct ice thickness measurements, we obtain an approximation of ice thickness changes with time following the Zubov ice growth model. The associated cumulative freezing degree ( $C_{Fd}$ ) is derived from surface air temperatures. This variable is directly related to the level of sea ice growth. Modeled ice thickness fields for different periods are shown in Figure 15 as a function of  $\Delta C_{Fd}$ , where  $\Delta C_{Fd}$  denotes the average daily freezing degree ( $^{\circ}\text{C}$ ) of the whole growth period. That is,  $\Delta C_{Fd} = C_{Fd}/F_d$ , where  $F_d$  is the total days of an ice growth period.

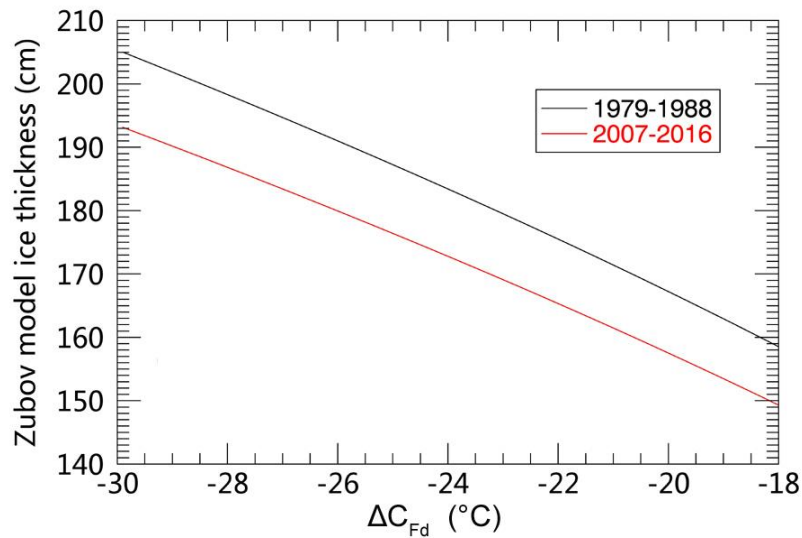

**Figure 15.** Modeled sea ice thickness change as a function of freezing degree (daily average,  $\Delta C_{Fd}$ ) for early (1979-1987) and recent (2007-2016) decades.

The downward slope of each line in Figure 15 ( $-3.83 \text{ cm}/^{\circ}\text{C}$  and  $-3.75 \text{ cm}/^{\circ}\text{C}$  for early and recent decades, respectively) represents the changes in thickness with the freezing air temperature. There is an increasing trend in SAT in the bay of  $0.95 \text{ }^{\circ}\text{C}/\text{de}$  (Figure 16). Based on estimates displayed in Figure 15, this air temperature enhancement implies a SAT increase in the bay of  $3.8 \text{ }^{\circ}\text{C}$  in the recent decade, which can be expected to cause a thickness decline of  $14.6 \text{ cm}$  and  $14.3 \text{ cm}$  (i.e. multiplying slope by  $3.8 \text{ }^{\circ}\text{C}$ ) for the early and recent decade, respectively.

The systematic bias between the two lines in Figure 15 one for each decade, corresponds to the ice thickness change in association with the change in the length of the freezing period. Due to warmer surface air in the recent decade, a difference in ice growth period of approximately 20 days is observed between the two decades (i.e., approximately  $-5 \text{ days}/\text{de}$ ), which is consistent with the delayed freezing and earlier melting dates in Baffin Bay (Stroeve et al., 2014). When taking into account the freezing period changes, a further  $\sim 10 \text{ cm}$  decline is identified due to the shortened days of freezing (Figure 10). Therefore, the increased SAT, together with the shortened length of the ice freezing period, can be expected to cause an average reduction in sea ice thickness of  $24.6 \text{ cm}$ .



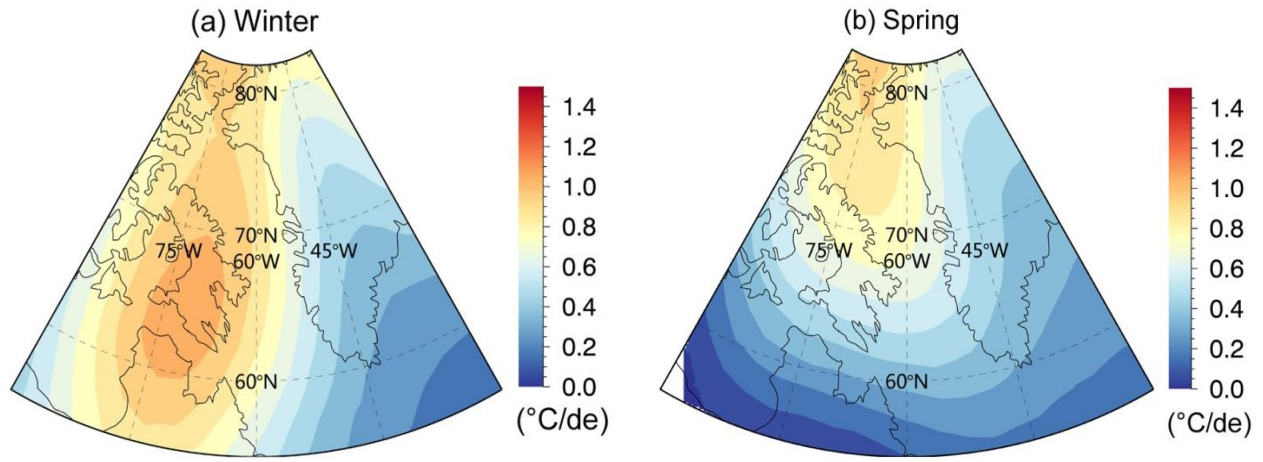

**Figure 16.** Surface air temperature trends for the period 1978/1979-2016/2017 during (a) winter and (b) spring periods

According to Equation (2), sea ice motion acceleration due to air and current dragging force ( $\tau_a$  and  $\tau_w$ ) is proportional to the inversion of thickness change (i.e.  $1/h$ ). Therefore, the recent ice thickness decline of 24.6 cm for an ice with a typical thickness of 1.8 m would lead to enhanced ice motion, 1.4 times that of the early decade. Our results prove that winter and spring sea ice motion in Baffin Bay in the recent decade are on average 1.6 times greater than those in the early decade (not shown). This is comparable in magnitude to the ice motion changes that are dependent on the thickness changes as we simulated. The remaining small part of ice motion acceleration can be explained by ice concentration decline. To summarize this section, the sea ice motion and area flux increases in Baffin Bay over the past four decades are mainly attributable to a thinner sea ice thickness which is primarily associated with the increase in surface air temperature. This is consistent with findings in the Arctic Ocean (Rampal et al., 2009; Spreen et al., 2011; Kwok et al., 2013).

## 6. Conclusions

With satellite-derived sea ice parameters, we estimated the sea ice inflow and outflow through the key fluxgates of Baffin Bay. The record of sea ice area flux was extended to span a nearly 40-yr period from 1978/1979-2016/2017. On the basis of the estimates, the variability and trends of sea ice area flux through the three fluxgates (North Gate, Lancaster Sound, and South Gate) for different timescales (monthly, seasonal, and annual flux) are examined in detail. Large interannual variations are detected for the different flux fields. Moreover, significant increasing trends are identified for the annual ice flux for the three gates, with the primary contributions from those during winter (December-February) and spring (March-May).

The spatiotemporal differences are obvious for the sea ice flux through different gates. On average, there is an inflow through North Gate ( $205.8 \times 10^3 \text{ km}^2$ ) and Lancaster Sound ( $55.2 \times 10^3 \text{ km}^2$ ) and an outflow via South Gate ( $394.3 \times 10^3 \text{ km}^2$ ). During cold seasons (winter and spring), the difference between inflow and outflow (i.e. inflow minus outflow) amounts to  $-153.3 \times 10^3 \text{ km}^2$  and is largely replenished by new ice formed within the bay that is likely associated with the divergence



mechanism. For the warm period (summer and autumn), the sea ice inflows ( $46.3 \times 10^3 \text{ km}^2$ ) and outflows ( $26.3 \times 10^3 \text{ km}^2$ ) are small, pointing to a net ice area loss of  $20.0 \times 10^3 \text{ km}^2$  that is connected to melting process in the bay. This emphasizes that the Baffin bay serves as not only an area of ice source during cold periods and but also an area of ice sink during warm periods. The sea ice growth and melting processes could have vital influences on the ocean current properties in Baffin Bay.

5 With regard to the diverse ice inflow sources into the northern Baffin Bay through the North Gate, the comparisons with published results seem to tally well with the fact that the majority of (about 75%~85%) of ice area originates from ice growth in NWP, in addition to the ice inputs via Nares Strait, Lancaster Sound, and Jones Sound.

The interannual variability of ice flux across the North and South Gates is in part linked to wind forcing associated with the cross-gate SLP differences, while the ice flow through Lancaster Sound is largely determined by orographic conditions.

10 The trends for the three gates (North Gate:  $38.9 \times 10^3 \text{ km}^2/\text{de}$ ; South Gate:  $82.2 \times 10^3 \text{ km}^2/\text{de}$ ; Lancaster Sound:  $7.5 \times 10^3 \text{ km}^2/\text{de}$ ) are significant, which are primarily explained by the increasing ice motion and to a small fraction by the decreasing ice concentration. The preliminary simulation demonstrates that the sea ice motion, which has been accelerated over the past four decades, is mainly attributable to the decline in ice thickness in Baffin Bay. Furthermore, modeling results unveiled that the warmer climate plays a decisive role in generating a thinner ice in the bay.

## 15 Acknowledgements

The authors would like to thank the data providers as follows. NSIDC provided the satellite-derived ice motion and concentration data, and National Centers for Environmental Prediction/National Center for Atmospheric Research (NCEP/NCAR) provided the reanalysis product. We are grateful for the suggestions from J. Zhang, M. Steel, and A. Schweiger (University of Washington). Also, we appreciate the constructive comments from the three

20 anonymous reviewers. This work was supported by the National Natural Science Foundation of China under Grants 41406215 and 41706194, a fund provided by the Qingdao National Laboratory for Marine Science and Technology, and the NSFC-Shandong Joint Fund for Marine Science Research Centers (U1606401).

## References

- Aagaard, K., and Carmack, E. C.: The role of sea ice and other fresh water in the Arctic circulation, *Journal of Geophysical Research Oceans*, 94, 14485–14498, 1989.
- 25 Agnew, T., Lambe, A., and Long, D.: 2008: Estimating sea ice area flux across the Canadian Arctic Archipelago using enhanced, *Journal of Geophysical Research Oceans*, 113, -, 2008.
- Bi, H., Huang, H., Fu, M., Fu, T., Zhou, X., and Xu, X.: Estimating sea-ice volume flux out of the Laptev Sea using multiple satellite observations, *Polar Research*, 35, 2016a.
- 30 Bi, H., Sun, K., Zhou, X., Huang, H., and Xu, X.: Arctic Sea Ice Area Export Through the Fram Strait Estimated From Satellite-Based Data:1988–2012, *IEEE Journal of Selected Topics in Applied Earth Observations & Remote Sensing*, 9, 3144-3157, 2016b.

- Cho, K., Sasaki, N., Shimoda, H., Sakata, T., and Nishio, F.: Evaluation and improvement of SSM/I sea ice concentration algorithms for the Sea of Okhotsk, *Journal of the Remote Sensing Society of Japan*, 16, 47-58, 1996.
- Cimadoribus, A. A., Drijfhout, S. S., Toom, M. D., and Dijkstra, H. A.: Sensitivity of the Atlantic meridional overturning circulation to South Atlantic freshwater anomalies, *Climate Dynamics*, 39, 2291-2306, 2012.
- 5 Comiso, J. C., Gersten, R., Stock, L., Turner, J., Perez, G., and Cho, K.: Positive trends in the Antarctic sea ice cover and associated changes in surface temperature, *Journal of Climate*, 30, 2251–2267, doi:10.1175/JCLI-D-0408.1, 2017a.
- Comiso, J. C., Meier, W. N., and Gersten, R.: Variability and trends in the Arctic Sea ice cover: Results from different techniques, *Journal of Geophysical Research*, 122, 2017b.
- Cuny, J., Rhines, P. B., and Kwok, R.: Davis Strait volume, freshwater and heat fluxes, *Deep Sea Research Part I*  
10 *Oceanographic Research Papers*, 52, 519-542, 2005.
- Cuny, J., Rhines, P. B., and Niiler, P. P.: Labrador Sea Boundary Currents and the Fate of the Irminger Sea Water, *Journal of Physical Oceanography*, 32, 627-647, 2002.
- Curry, B., Lee, C. M., Moritz, R. E., and Kwok, R.: Multiyear Volume, Liquid Freshwater, and Sea Ice Transports through Davis Strait, 2004-10, *Journal of Physical Oceanography*, 44, 1244-1266, 2014.
- 15 Dey, B.: Monitoring winter sea ice dynamics in the Canadian Arctic with NOAA-TIR images, *Journal of Geophysical Research Oceans*, 86, 3223-3235, 1981.
- Dunlap, E., and Tang, C. L.: Modelling the mean circulation of Baffin Bay, *Atmosphere*, 44, 99-109, 2006.
- Goosse, H., Fichet, T., and Campin, J. M.: The effects of the water flow through the Canadian Archipelago in a global ice-ocean model, *Geophysical Research Letters*, 24, 1507–1510, 1997.
- 20 Graham, R. M., Cohen, L., Petty, A. A., Boisvert, L. N., Rinke, A., Hudson, S. R., Nicolaus, M., and Granskog, M. A.: Increasing frequency and duration of Arctic winter warming events, *Geophysical Research Letters*, 44, 6974-6983, 2017.
- Hawkins, E., Smith, R. S., Allison, L. C., Gregory, J. M., Woollings, T. J., Pohlmann, H., and Cuevas, B. D.: Bistability of the Atlantic overturning circulation in a global climate model and links to ocean freshwater transport, *Geophysical*  
25 *Research Letters*, 38, 415-421, 2011.
- Holland, M. M., Bitz, C. M., Eby, M., and Weaver, A. J.: The Role of Ice-Ocean Interactions in the Variability of the North Atlantic Thermohaline Circulation, *Journal of Climate*, 14, 656-675, 2001.
- Jahn, A., Tremblay, B., Mysak, L. A., and Newton, R.: Effect of the large-scale atmospheric circulation on the variability of the Arctic Ocean freshwater export, *Climate Dynamics*, 34, 201-222, 2010.
- 30 Kalnay, E., Kanamitsu, M., Kistler, R., Collins, W., Deaven, D., Gandin, L., Iredell, M., Saha, S., White, G., and Woollen, J.: The NCEP/NCAR 40-Year Reanalysis Project, *Bulletin of the American Meteorological Society*, 77, 437-472, 1996.
- Krumpen, T., Janout, M., Hodges, K. I., and Gerdes, R.: Variability and trends in Laptev Sea ice outflow between 1992–2011, *Cryosphere*, 7, 349-363, 2013.
- 35 Krumpen, T., Gerdes, R., Haas, C., Hendricks, S., Herber, A., Selyuzhenok, V., Smedsrud, L., and Spreen, G.: Recent summer sea ice thickness surveys in Fram Strait and associated ice volume fluxes, *Cryosphere*, 10, 523-534, 2016.
- Kwok, R.: Variability of Nares Strait ice flux, *Geophysical Research Letters*, 32, 1064-1067, 2005.
- Kwok, R., Maslowski, W., and Laxon, S. W.: On large outflows of Arctic sea ice into the Barents Sea, *Geophysical Research Letters*, 32, 45-81, 2005.
- 40 Kwok, R.: Baffin Bay ice drift and export: 2002–2007, *Geophysical Research Letters*, 34, 2002-2007, 2007.
- Kwok, R.: Outflow of Arctic ocean sea ice into the Greenland and Barents Seas: 1979-2007, *Journal of Climate*, 22, 2438-2457, 2009.
- Kwok, R., Toudal, P. L., Gudmsen, P., and Pang, S. S.: Large sea ice outflow into the Nares Strait in 2007, *Geophysical Research Letters*, 37, 93-101, 2010.
- 45 Kwok, R., Spreen, G., and Pang, S.: Arctic sea ice circulation and drift speed: Decadal trends and ocean currents, *Journal of Geophysical Research Oceans*, 118, 2408-2425, 2013.

- Melling, H., Gratton, Y., and Ingram, G.: Ocean circulation within the North Water polynya of Baffin Bay, *Atmosphere*, 39, 301-325, 2001.
- Parkinson, C. L., and Cavalieri, D. J.: A 21 year record of Arctic sea-ice extents and their regional, seasonal and monthly variability and trends, *Annals of Glaciology*, 34, 441-446, 2017.
- 5 Peterson, I. K., and Pettipas, R.: Trends In air temperature and sea ice in the Atlantic Large Aquatic Basin and adjoining areas, Canadian Technical Report, Hydrography, Ocean Science, 290, 2013.
- Qian, Y., Dixon, T. H., Myers, P. G., Bonin, J., Chambers, D., and Broeke, M. R. V. D.: Recent increases in Arctic freshwater flux affects Labrador Sea convection and Atlantic overturning circulation, *Nature Communications*, 7, 10525, 2016.
- 10 Rampal, P., Weiss, J., and Marsan, D.: Positive trend in the mean speed and deformation rate of Arctic sea ice, 1979&ndash;2007, *Journal of Geophysical Research: Oceans*, 114, -, 2009.
- Rudels, B.: The outflow of polar water through the Arctic Archipelago and the oceanographic conditions in Baffin Bay, *Polar Research*, 4, 161-180, 2010.
- Serreze, M. C., Barrett, A. P., Stroeve, J. C., and Kindig, D. N.: The emergence of surface-based Arctic amplification, 15 *Cryosphere Discussions*, 3, 11-19, 2009.
- Smedsrud, L. H., Sirevaag, A., Kloster, K., Sorteberg, A., and Sandven, S.: Recent wind driven high sea ice area export in the Fram Strait contributes to Arctic sea ice decline, *Cryosphere*, 5, 821-829, 2011.
- Smedsrud, L. H., Halvorsen, M. H., Stroeve, J. C., Zhang, R., and Kloster, K.: Fram Strait sea ice export variability and September Arctic sea ice extent over the last 80 years, *Cryosphere*, 11, 65-79, 2017.
- 20 Spreen, G., Kern, S., Stammer, D., Forsberg, R., and Haarpaintner, J.: Satellite-based estimates of sea-ice volume flux through Fram Strait, *Annals of Glaciology*, 44, 321-328(328), 2006.
- Spreen, G., Kwok, R., and Menemenlis, D.: Trends in Arctic sea ice drift and role of wind forcing: 1992&ndash;2009, *Geophysical Research Letters*, 38, L19501, 2011.
- Stern, H. L., and Heide-Jørgensen, M. P.: Trends and variability of sea ice in Baffin Bay and Davis Strait, 1953–2001, *Polar Research*, 22, 11-18, 2003.
- 25 Stroeve, J., Schroder, D., Tsamados, M., and Feltham, D.: Warm Winter, Thin Ice?, *The Cryosphere*, 12, 1791-1809, 2018.
- Stroeve, J. C., Markus, T., Boisvert, L., Miller, J., and Barrett, A.: Changes in Arctic melt season and implications for sea ice loss, *Geophysical Research Letters*, 41, 1216-1225, 2014.
- Tschudi, M., Fowler, C., Maslanik, J., Stewart, J. S., and Meier, W.: Polar Pathfinder Daily 25 km EASE-Grid Sea Ice Motion Vectors. Version 3, NSIDC., Boulder, Colorador, doi:10.5067/O57VAIT2AYYY, [Accessed April, 2016.], 30 2016.
- Yang, Q., Dixon, T. H., Myers, P. G., Bonin, J., Chambers, D., and Mr, V. D. B.: Recent increases in Arctic freshwater flux affects Labrador Sea convection and Atlantic overturning circulation, *Nature Communications*, 7, 10525, 2016.
- Zhang, Z., Bi, H., Huang, H., Liu, Y., and Yan, L.: Arctic sea ice volume export through the Fram Strait from combined 35 satellite and model data: 1979–2012, *Acta Oceanologica Sinica*, 36, 44-55, 2017.

Supplement figures:

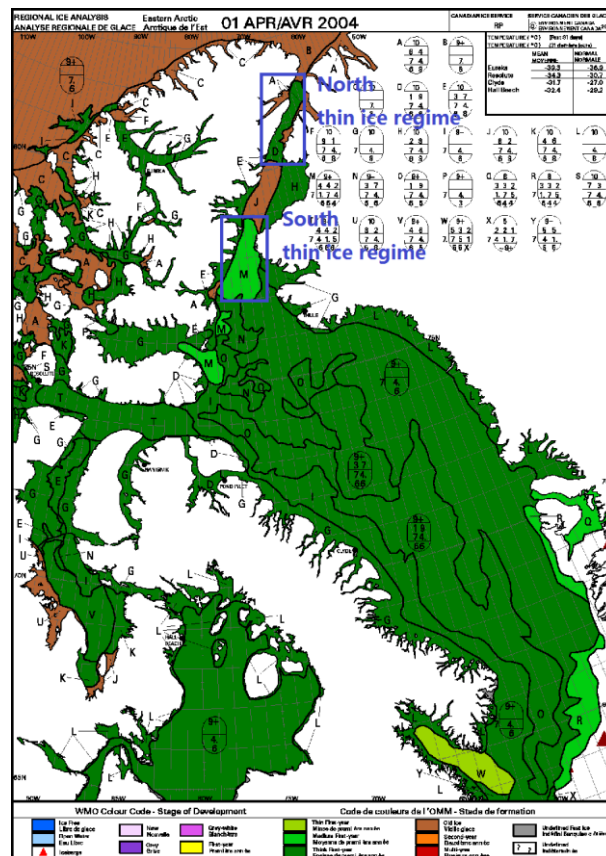

Figure S1a. CIS map for sea ice category in April 2014. The young ice south of the two bridges are shown.

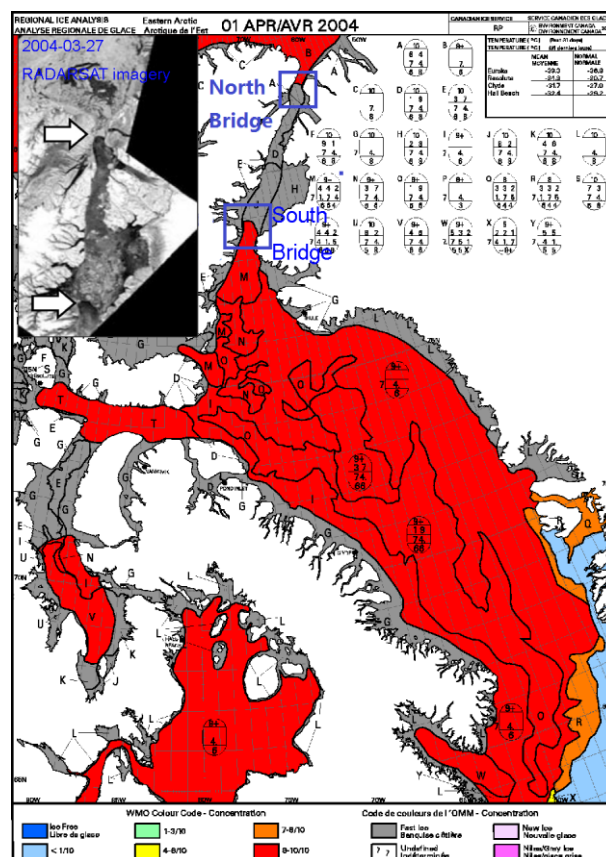

Figure S1b. CIS map of sea ice concentration in April 2014. The two ice bridges are shown. The corresponding RADARSAT imagery is displayed in the inset grey figure.
